# Supplementary material for: Multiple‑Antibiotic Resistance (MAR) Index, Not Integron Prevalence, Predicts Ciprofloxacin Resistance in Community Ampicillin-Resistant Escherichia coli from Turkiye
Source: Research Square preprint supplement (doi:10.21203/rs.3.rs-7997531/v1), 2025-11-03

# Supplementary Table S1. Integron vs Antibiotic Resistance Prevalence

| Antibiotic | Int+ R/Total | Int- R/Total | *p* | *q* |
| --- | --- | --- | --- | --- |
| AMC | 19/37 | 20/28 | 0.1018 | 0.7966 |
| TZP | 4/37 | 6/28 | 0.3064 | 0.7966 |
| CXM | 15/37 | 15/28 | 0.2967 | 0.7966 |
| FOX | 2/37 | 3/28 | 0.6444 | 0.9722 |
| CAZ | 14/37 | 9/28 | 0.6344 | 0.9722 |
| CRO | 14/37 | 9/28 | 0.6344 | 0.9722 |
| FEP | 11/37 | 7/28 | 0.673 | 0.9722 |
| ERT | 0/37 | 0/28 | 1.0 | 1.0 |
| MEM | 0/37 | 0/28 | 1.0 | 1.0 |
| AK | 1/37 | 0/28 | 1.0 | 1.0 |
| GN | 1/37 | 0/28 | 1.0 | 1.0 |
| CIP | 20/37 | 19/28 | 0.2607 | 0.7966 |
| SXT | 26/37 | 15/28 | 0.1672 | 0.7966 |

*p* = Chi‑square or Fisher exact as appropriate; *q* = Benjamini–Hochberg FDR. AMC: amoxicillin/clavulanate; TZP: piperacillin/tazobactam; CXM: cefuroxime; FOX: cefoxitin; CAZ: ceftazidime; CRO: ceftriaxone; FEP: cefepime; ERT: ertapenem; MEM: meropenem; CN: gentamicin; AK: amikacin; CIP: ciprofloxacin; SXT: trimethoprim/sulfamethoxazole.

## Supplementary Table S2. Firth-penalised multivariable logistic regression

| Variable | β | OR | 95% CI Lower | 95% CI Upper | *p*-value |
| --- | --- | --- | --- | --- | --- |
| Intercept | -3.5 | 0.03 | 0.003 | 0.31 | 0.003 |
| MAR index (per 0.01) | 3.53 | 34.2 | 4.0 | 292.0 | <0.001 |
| Integron | 0.09 | 1.1 | 0.26 | 4.0 | 0.81 |
| CTX‑M | -2.14 | 0.12 | 0.01 | 1.0 | 0.05 |
| *qnrS* | 0.77 | 2.1 | 0.4 | 11.8 | 0.37 |
| *qnrB* | 1.11 | 3.0 | 0.29 | 31.5 | 0.35 |
| *aac(6')‑Ib‑cr* | 0.07 | 1.07 | 0.1 | 11.5 | 0.96 |

Bias‑reduced (Firth) model; MAR index is the only significant predictor (*p* < 0.001).

## Supplementary Table S3. Full isolate-level dataset

The complete isolate-level dataset is provided as an Excel file: Additional file 1

## Supplementary Table S4. PCR cycling parameters

| Reaction | First Denaturation | Denaturation | Elongation | Extension | Final Extension | Cycle |
| --- | --- | --- | --- | --- | --- | --- |
| *intI1*/*intI2* integrase | 94 °C (5 min) | 94 °C (1 min) | 57 °C (5 min) | 72 °C (1 min) | 72 °C (10 min) | 34 |
| Class 1 Integron | 94 °C (2 min) | 94 °C (30 sec) | 56°C (45 sec) | 72 °C (3 min) | 72 °C (5min) | 34 |
| Class 2 Integron | 94 °C (3 min) | 94 °C (45 sec) | 55 °C (1 min) | 72 °C (2 min) | 72 °C (5 min) | 34 |
| *bla*TEM | 94 °C (5 min) | 94 °C (1 min) | 56 °C (1 min) | 72 °C (1 min) | 72 °C (7 min) | 34 |
| *bla*SHV | 94 °C (2 min) | 94 °C (30 sec) | 60 °C (30 sec) | 72 °C (1 min) | 72 °C (4 min) | 35 |
| *bla*CTX-M | 94 °C (2 min) | 95 °C (20sec) | 51 °C (30 sec) | 72 °C (30 sec) | 72 °C (3 min) | 35 |
| *bla*CTX-M Groups 1, 2, 8 and 9 | 95 °C (2 min) | 95 °C (1 min) | 55 °C (1 min) | 72 °C (1min) | 72 °C (10 min) | 30 |
| Quinolone resistance genes | 94 °C (5 min) | 94 °C (1 min) | 55 °C (1 min) | 72 °C (1 min) | 72 °C (10 min) | 30 |
| Phylogenetic groups | 94 °C (4 min) | 94 °C (5 sec) | 59 °C (10 sec) | 72 °C (5 min) | 72 °C (5 min) | 30 |

Supplementary Table S5. Phylogenetic group analyses

**Supplementary Table S5a.** Distribution of phylogenetic groups among 65 E. coli isolates (REC1–REC65).

**Supplementary Table S5b–f.** Crosstab analyses of phylogenetic groups vs. MAR≥0.20, ciprofloxacin resistance, CTX-M positivity, any ESBL gene, and integron presence.

**Supplementary Table S5g.** Statistical test summary (test type and p-values).

Additional file 2. S3_phylogroup_tables.xlsx – Excel workbook containing all tables S5a–g.

**Supplementary Figure S1. Firth‑adjusted odds ratios for ciprofloxacin resistance.**


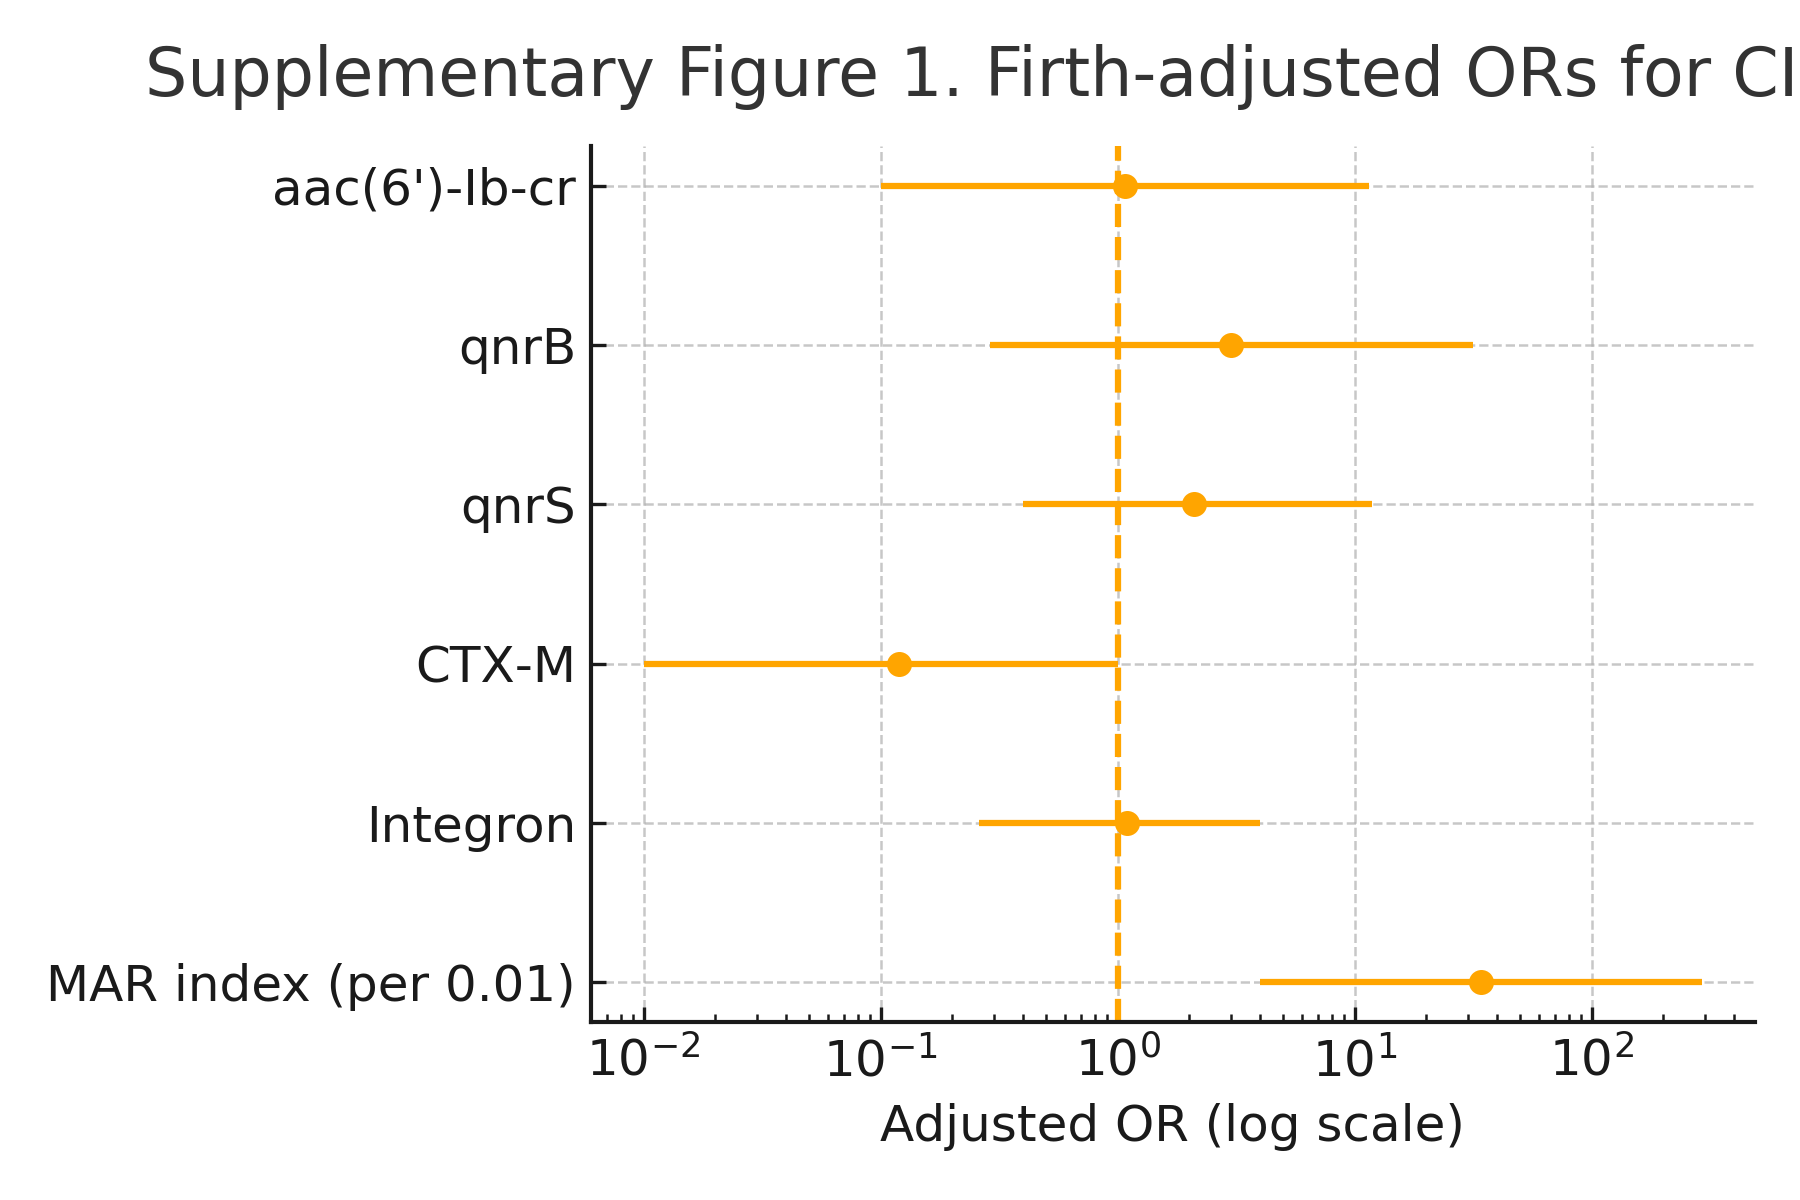


Forest plot from bias‑reduced (Firth) logistic regression showing adjusted odds ratios (dots) with 95 % confidence intervals on a log scale. MAR index remains the only significant predictor (*p* < 0.001).

**Supplementary Figure S2.** Bar plot showing the distribution of 65 E. coli isolates (REC1–REC65) across phylogenetic groups (A, B1, B2, D). The y‑axis indicates proportion (0–1); total n = 65.

**
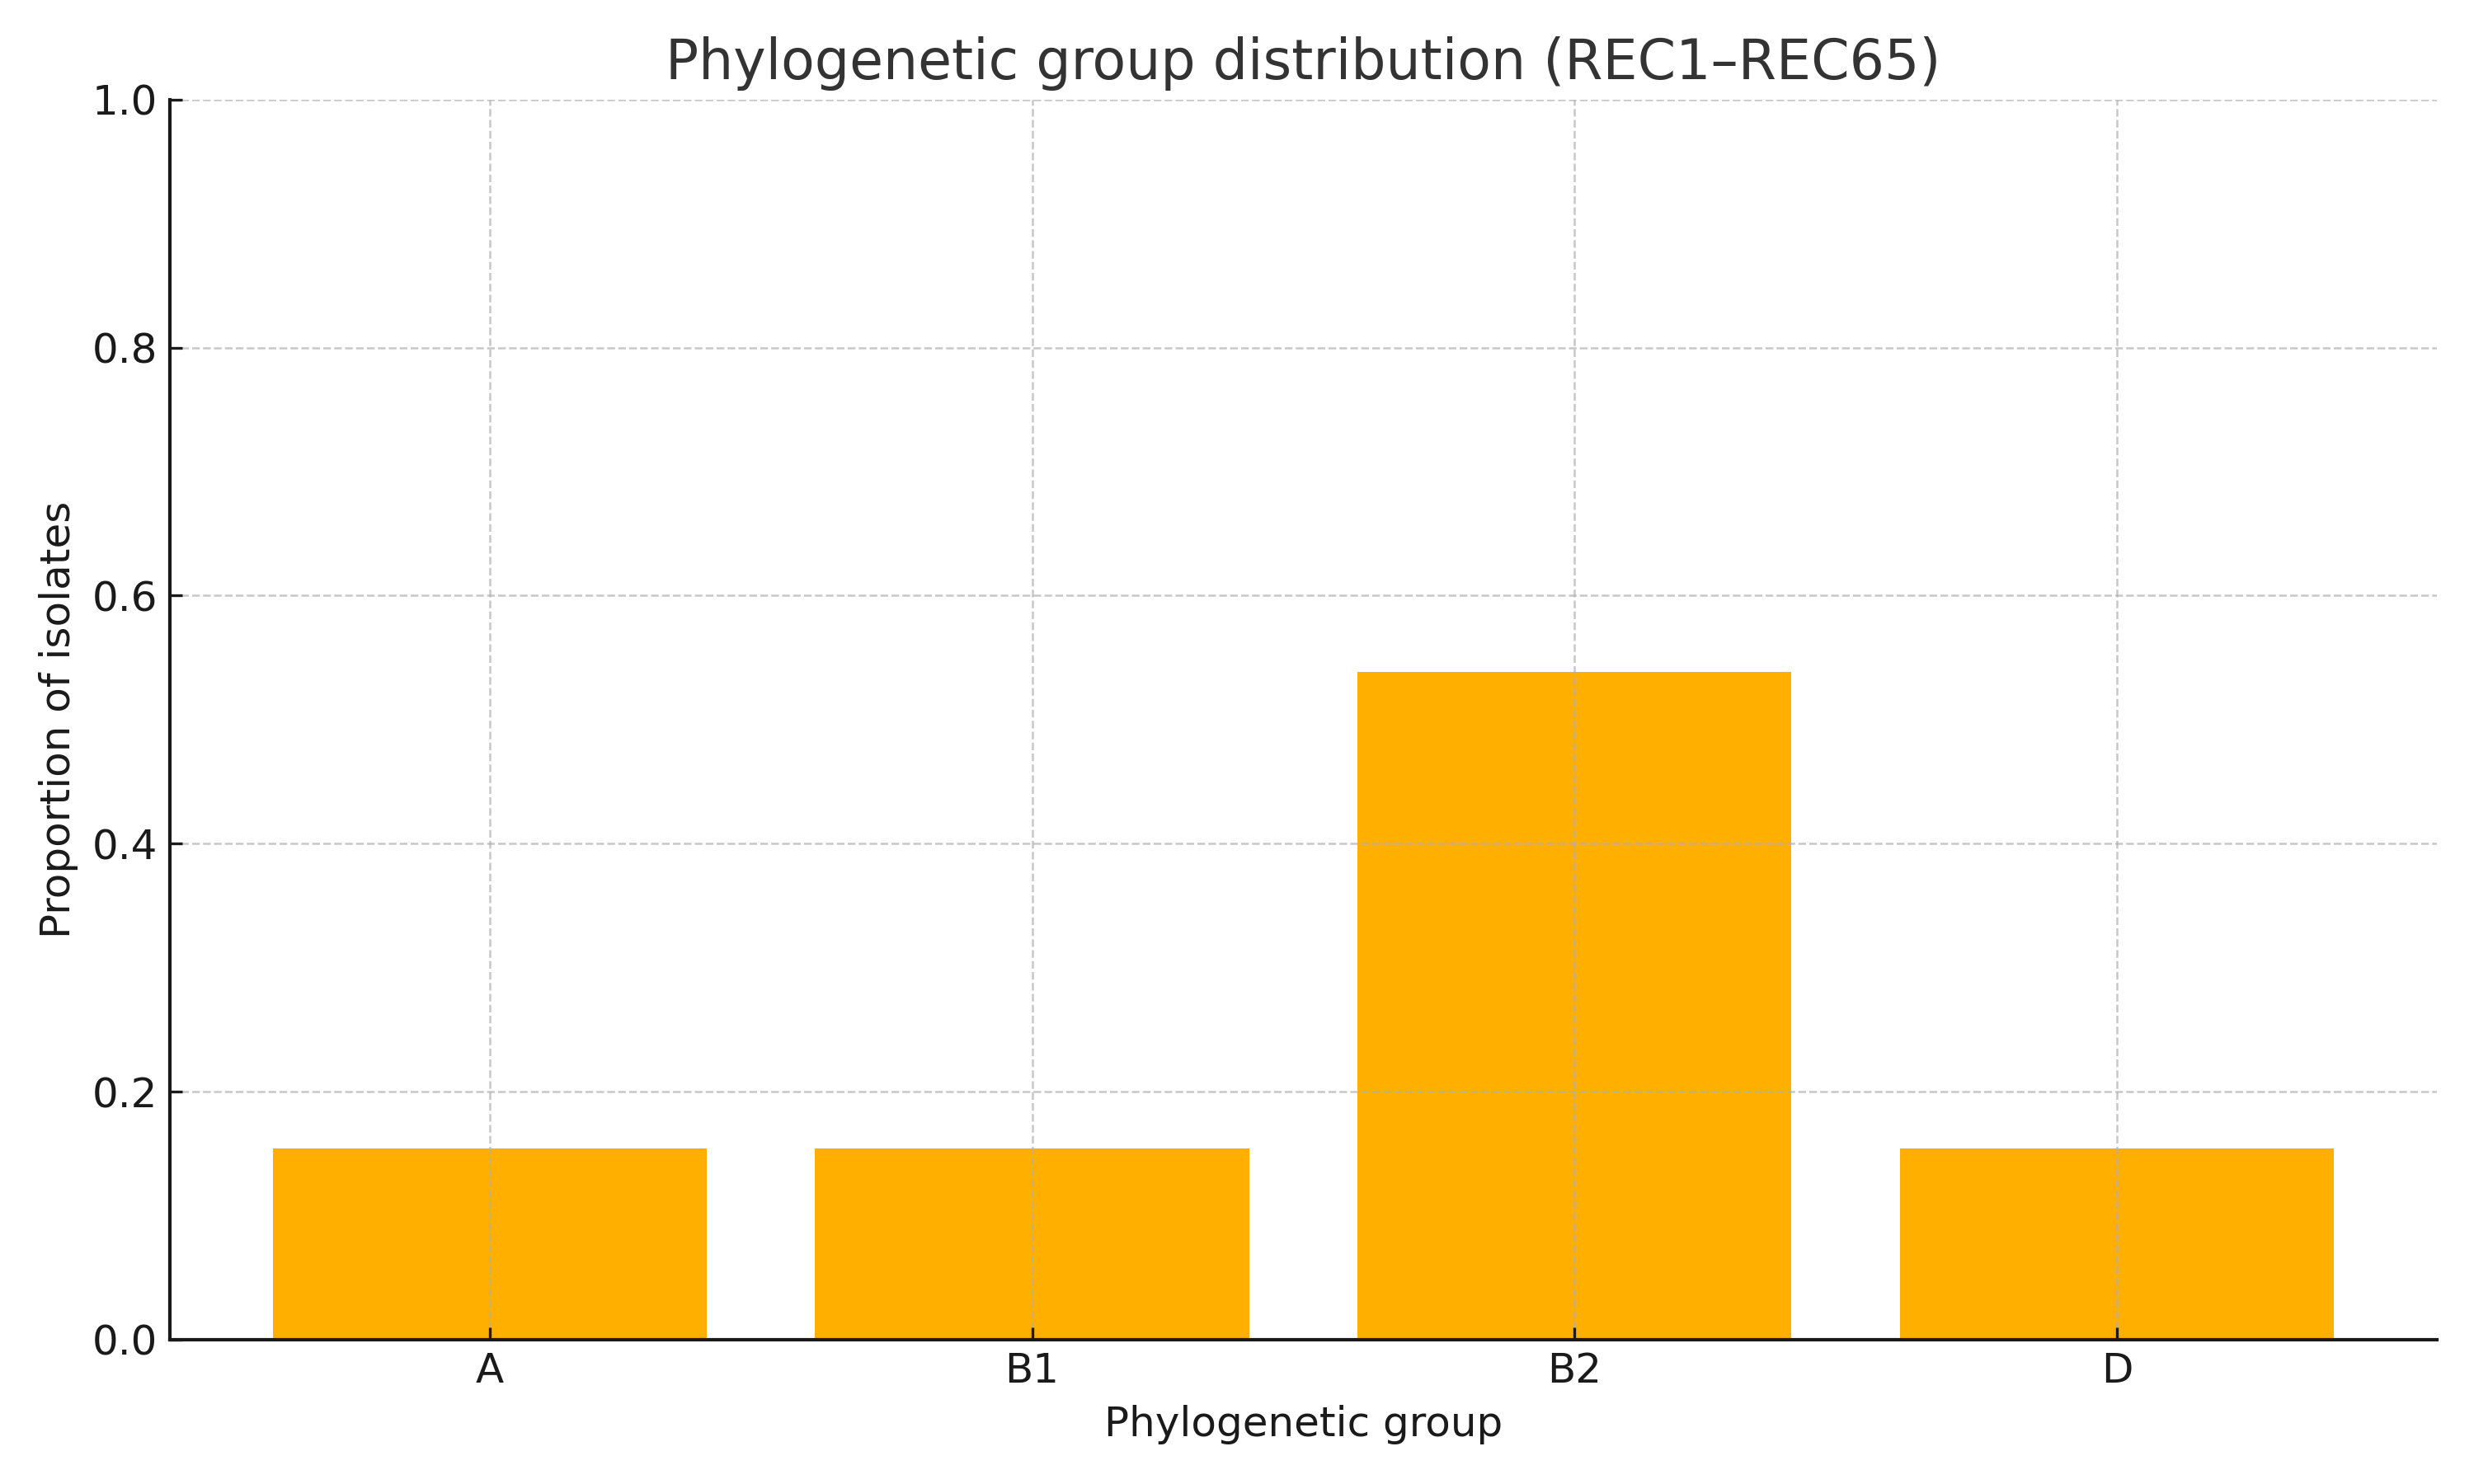
**

**Supplementary Figure S3.** Proportion of ciprofloxacin‑resistant (CIP‑R) isolates by phylogenetic group. The y‑axis indicates proportion (0–1). No significant differences were detected (χ², all p > 0.18; see Supplementary Table S5g).

**
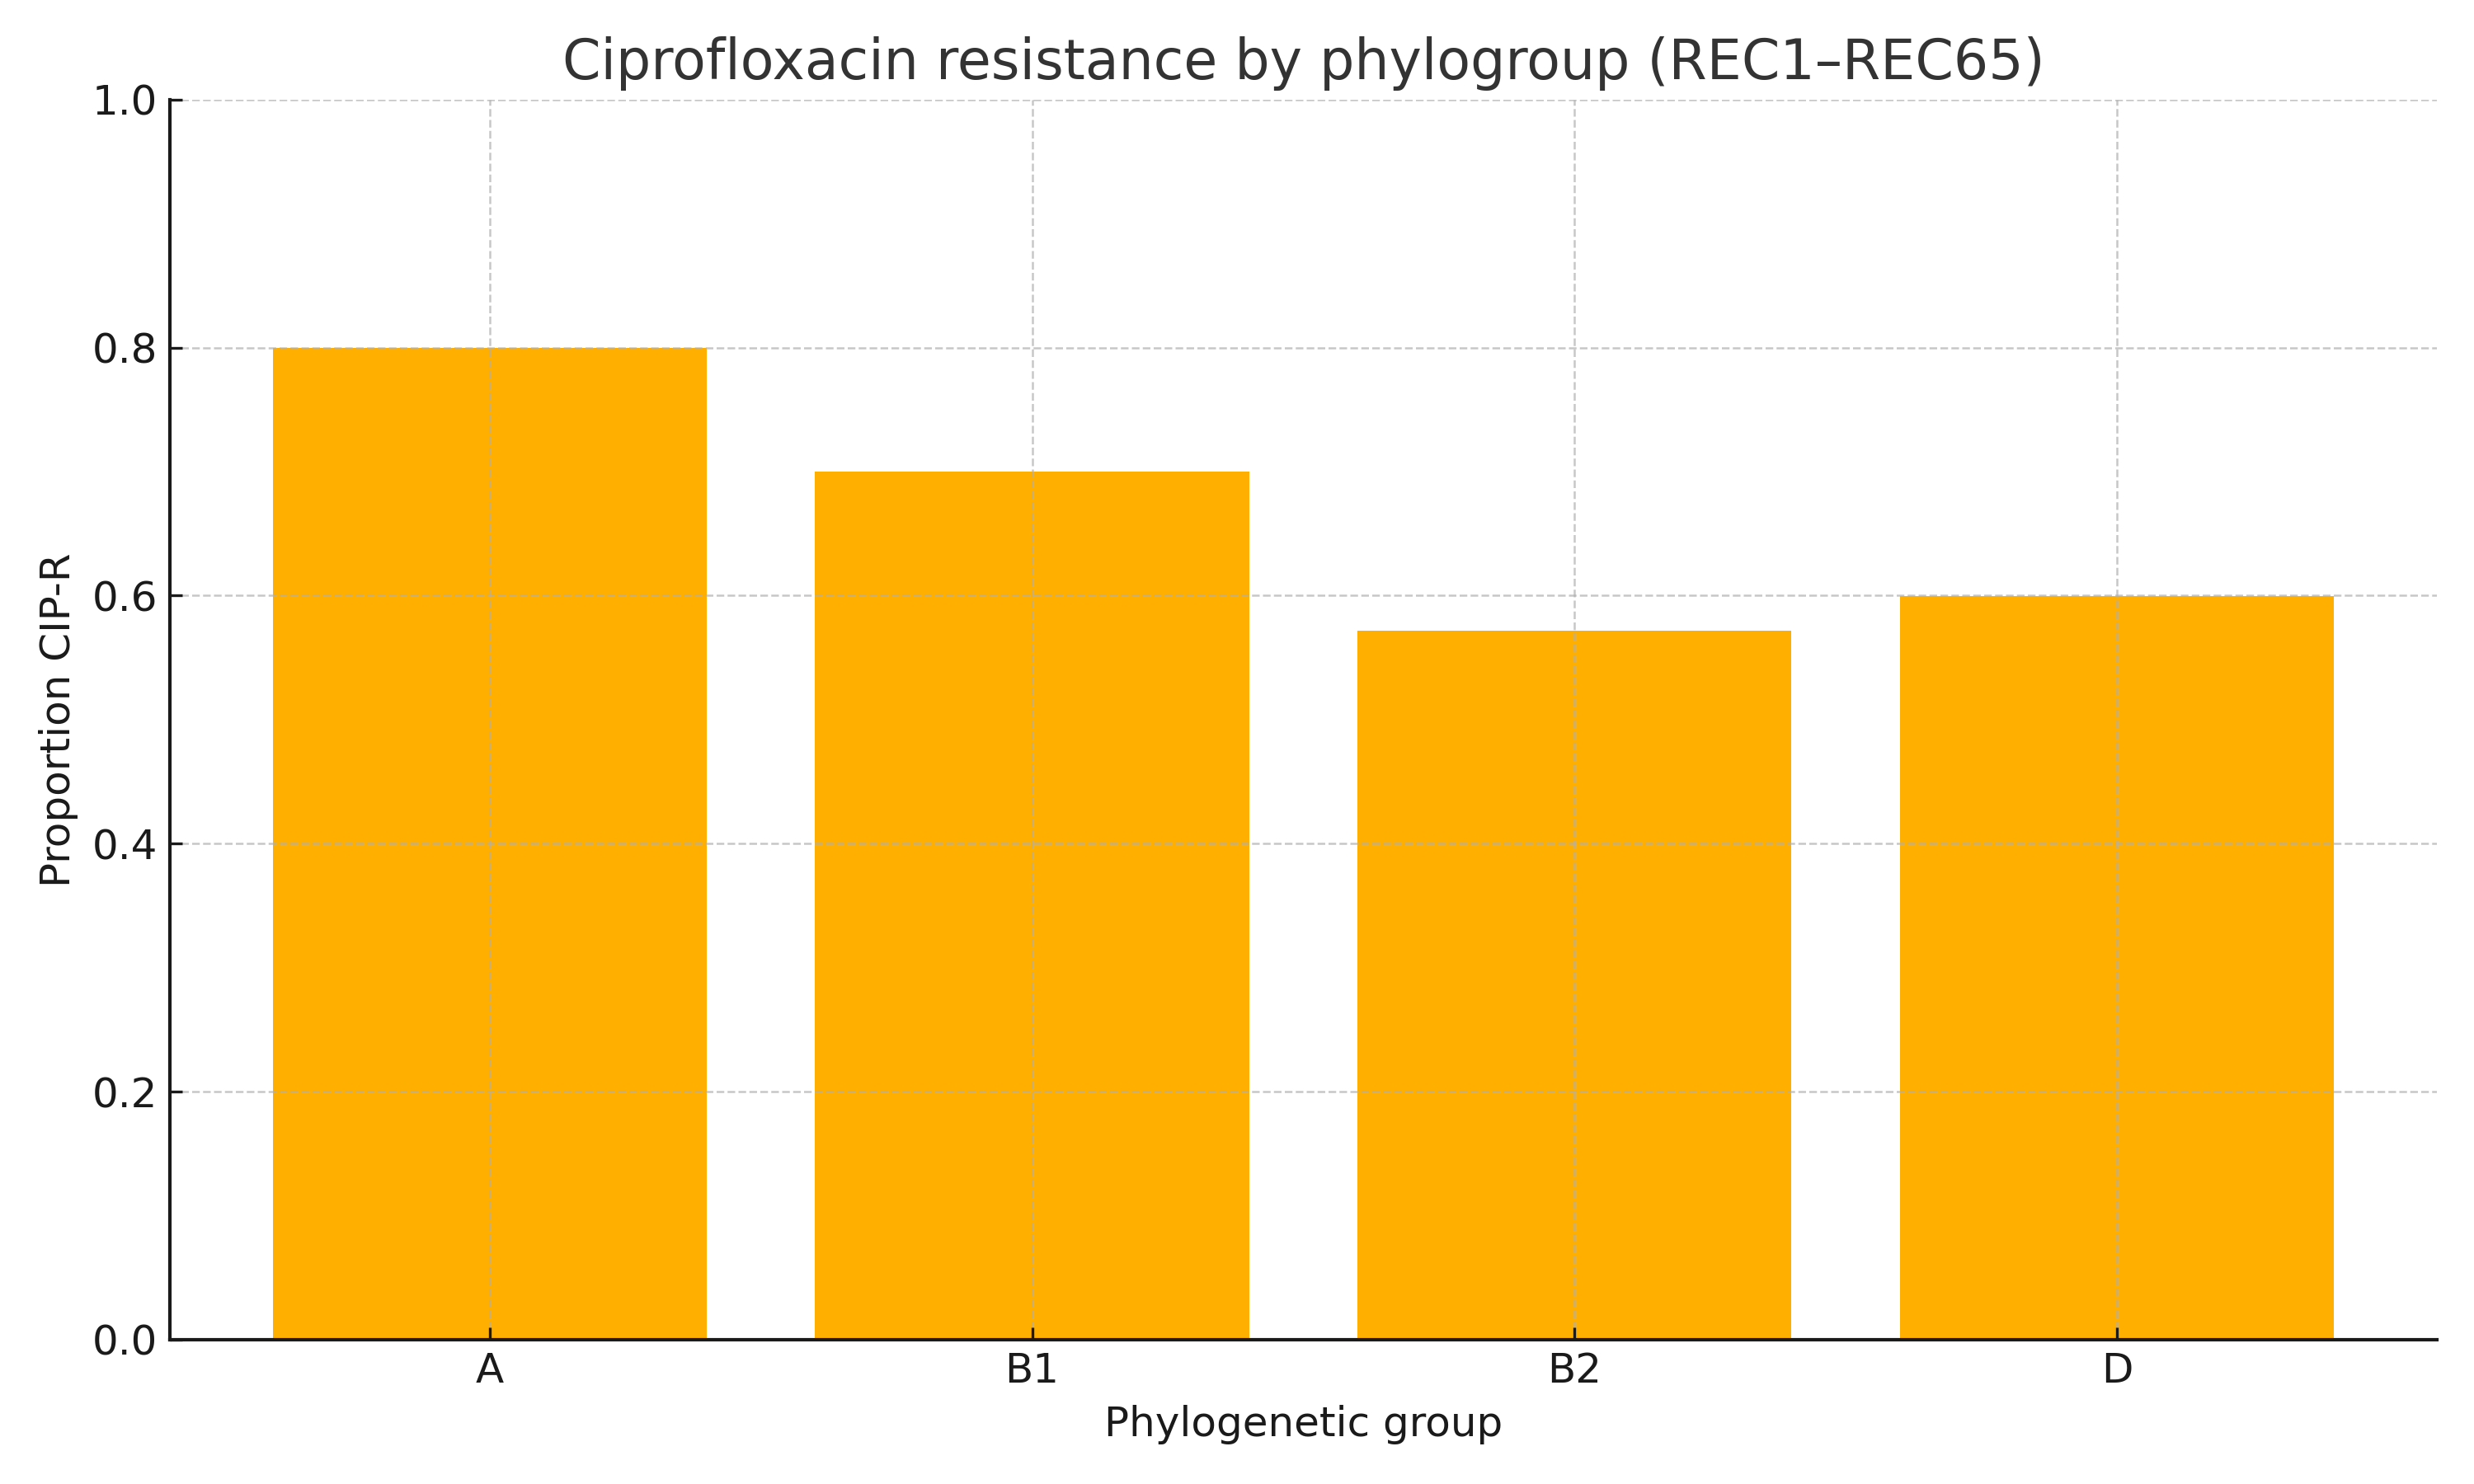
**

**Supplementary Figure S4.** Proportion of CTX-M–positive isolates by phylogenetic group. The y‑axis indicates proportion (0–1). No significant differences were detected (χ², p > 0.18; see Supplementary Table S5g).

**
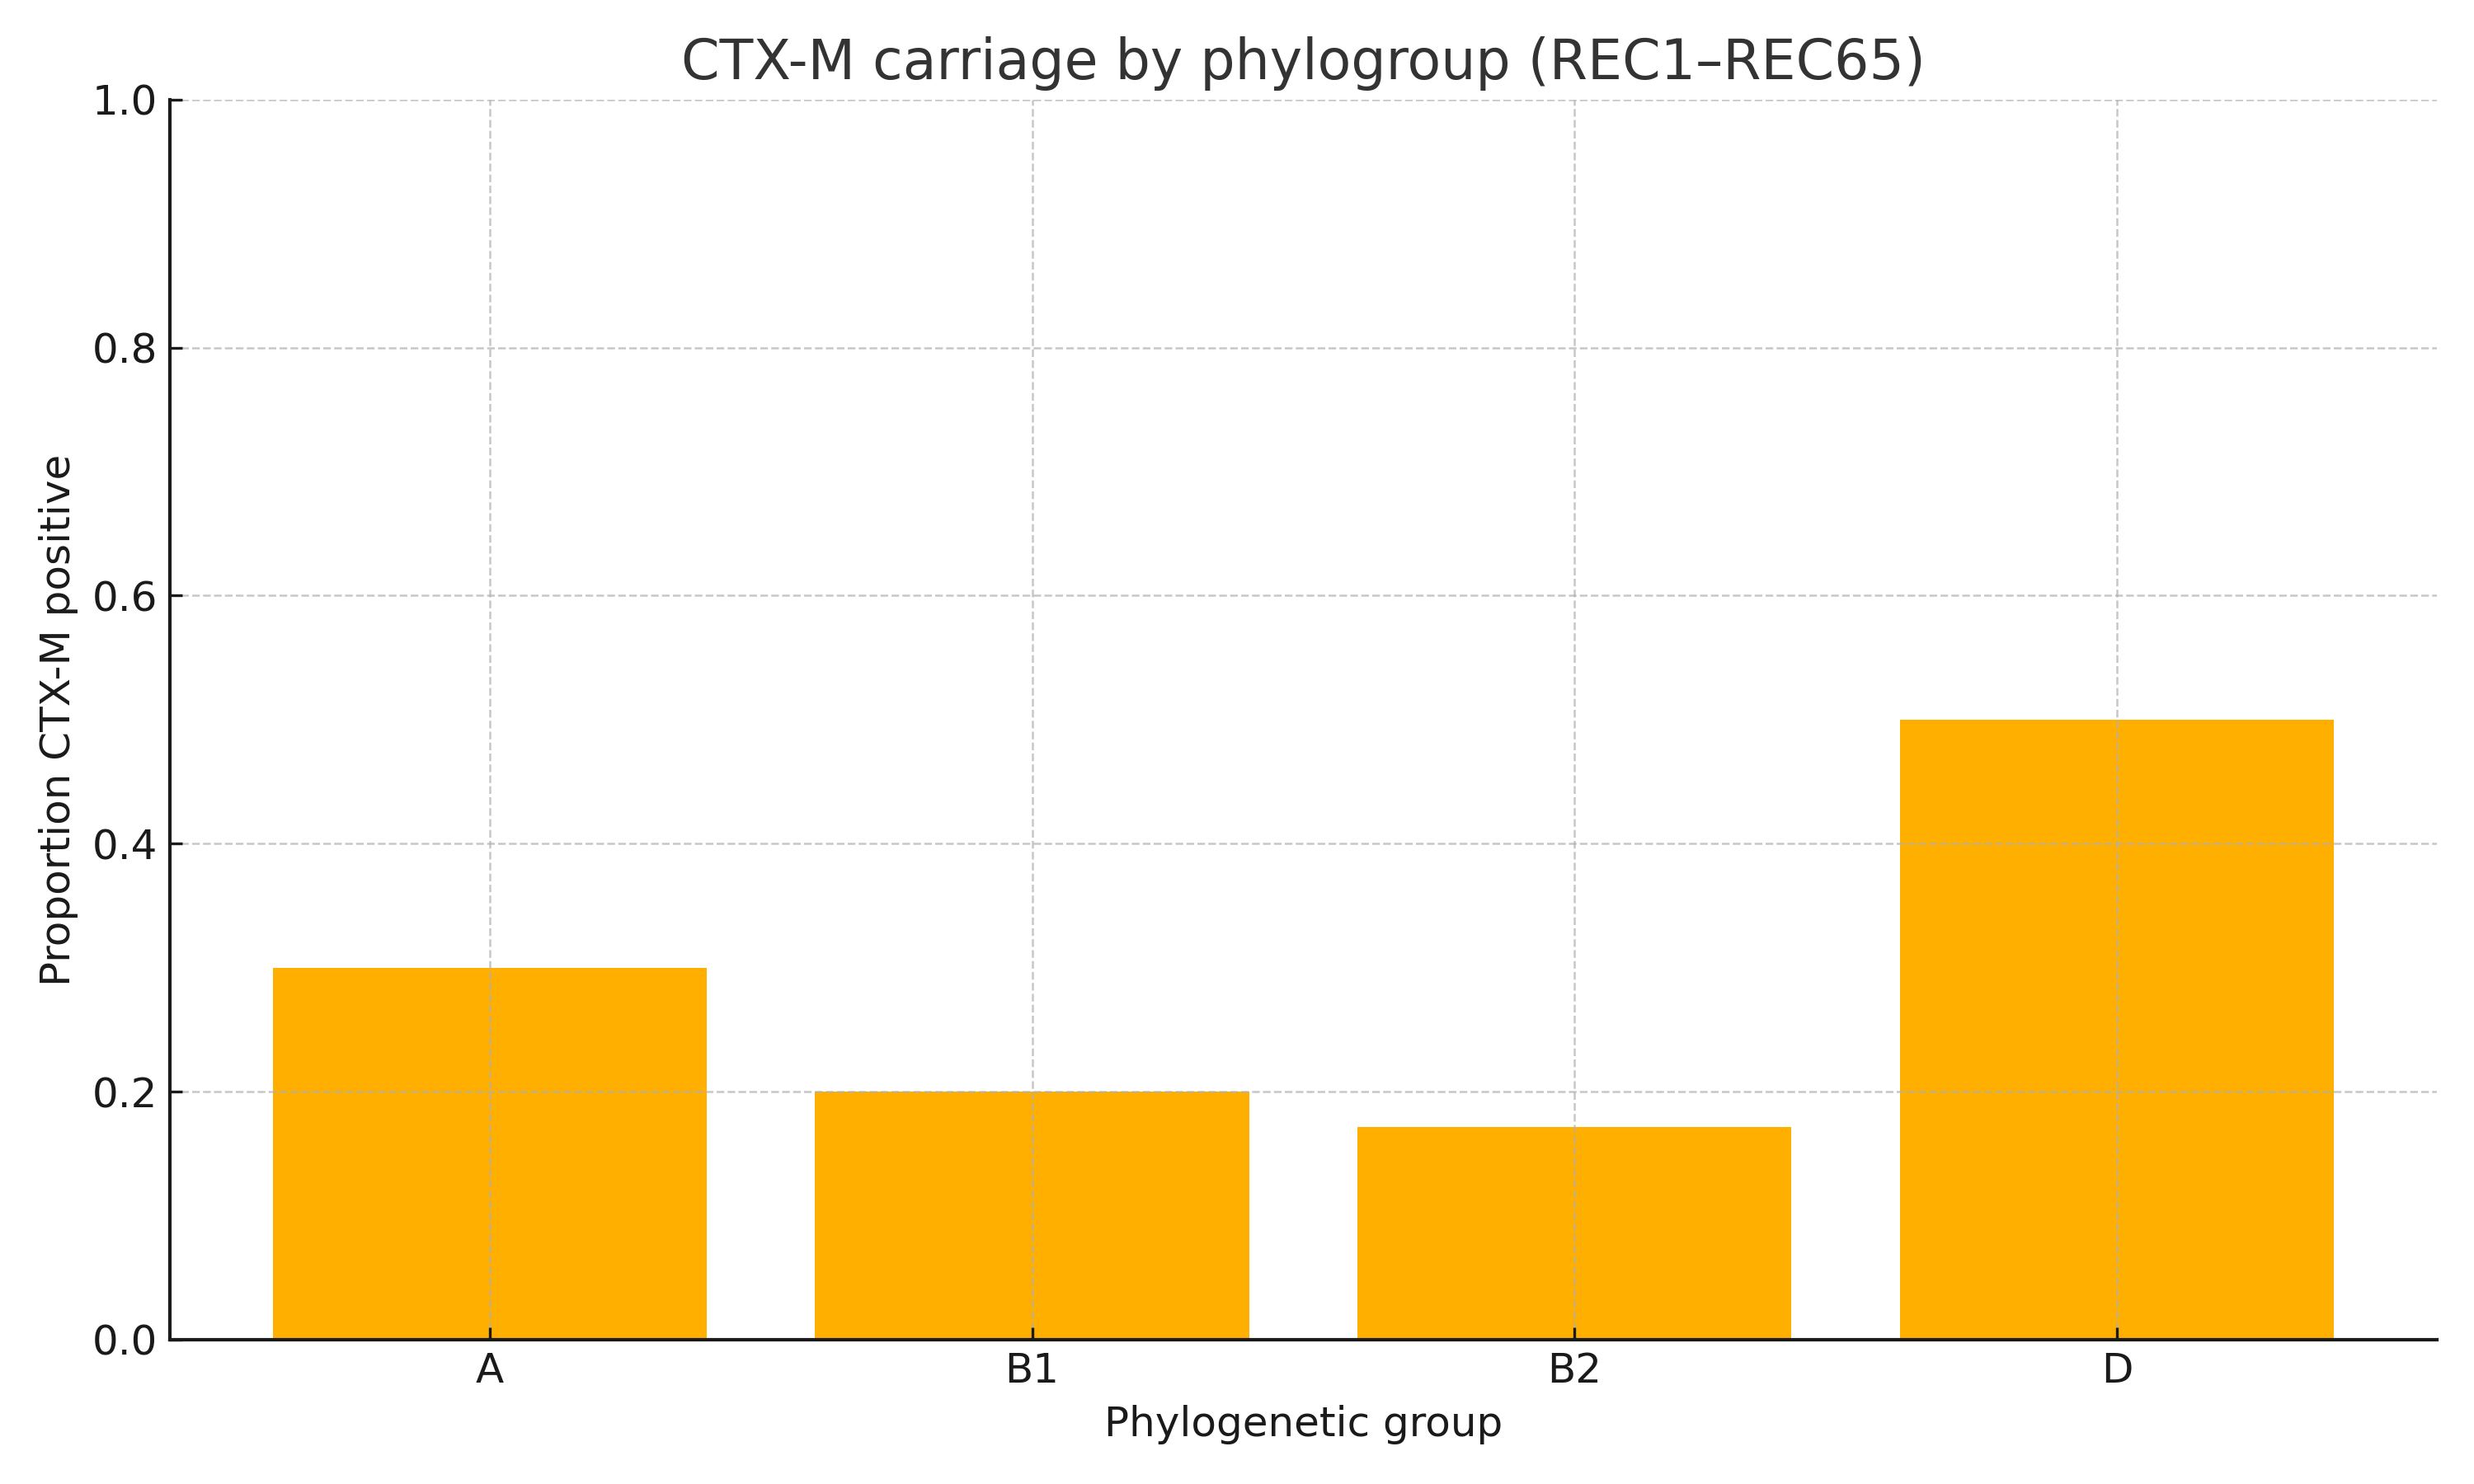
**

**Supplementary Figure S5.** Proportion of isolates carrying any ESBL gene (CTX-M/SHV/TEM/PER/VEB/GES/OXA) by phylogenetic group. The y‑axis indicates proportion (0–1). No significant differences were detected (χ², p > 0.18; see Supplementary Table S5g).

**
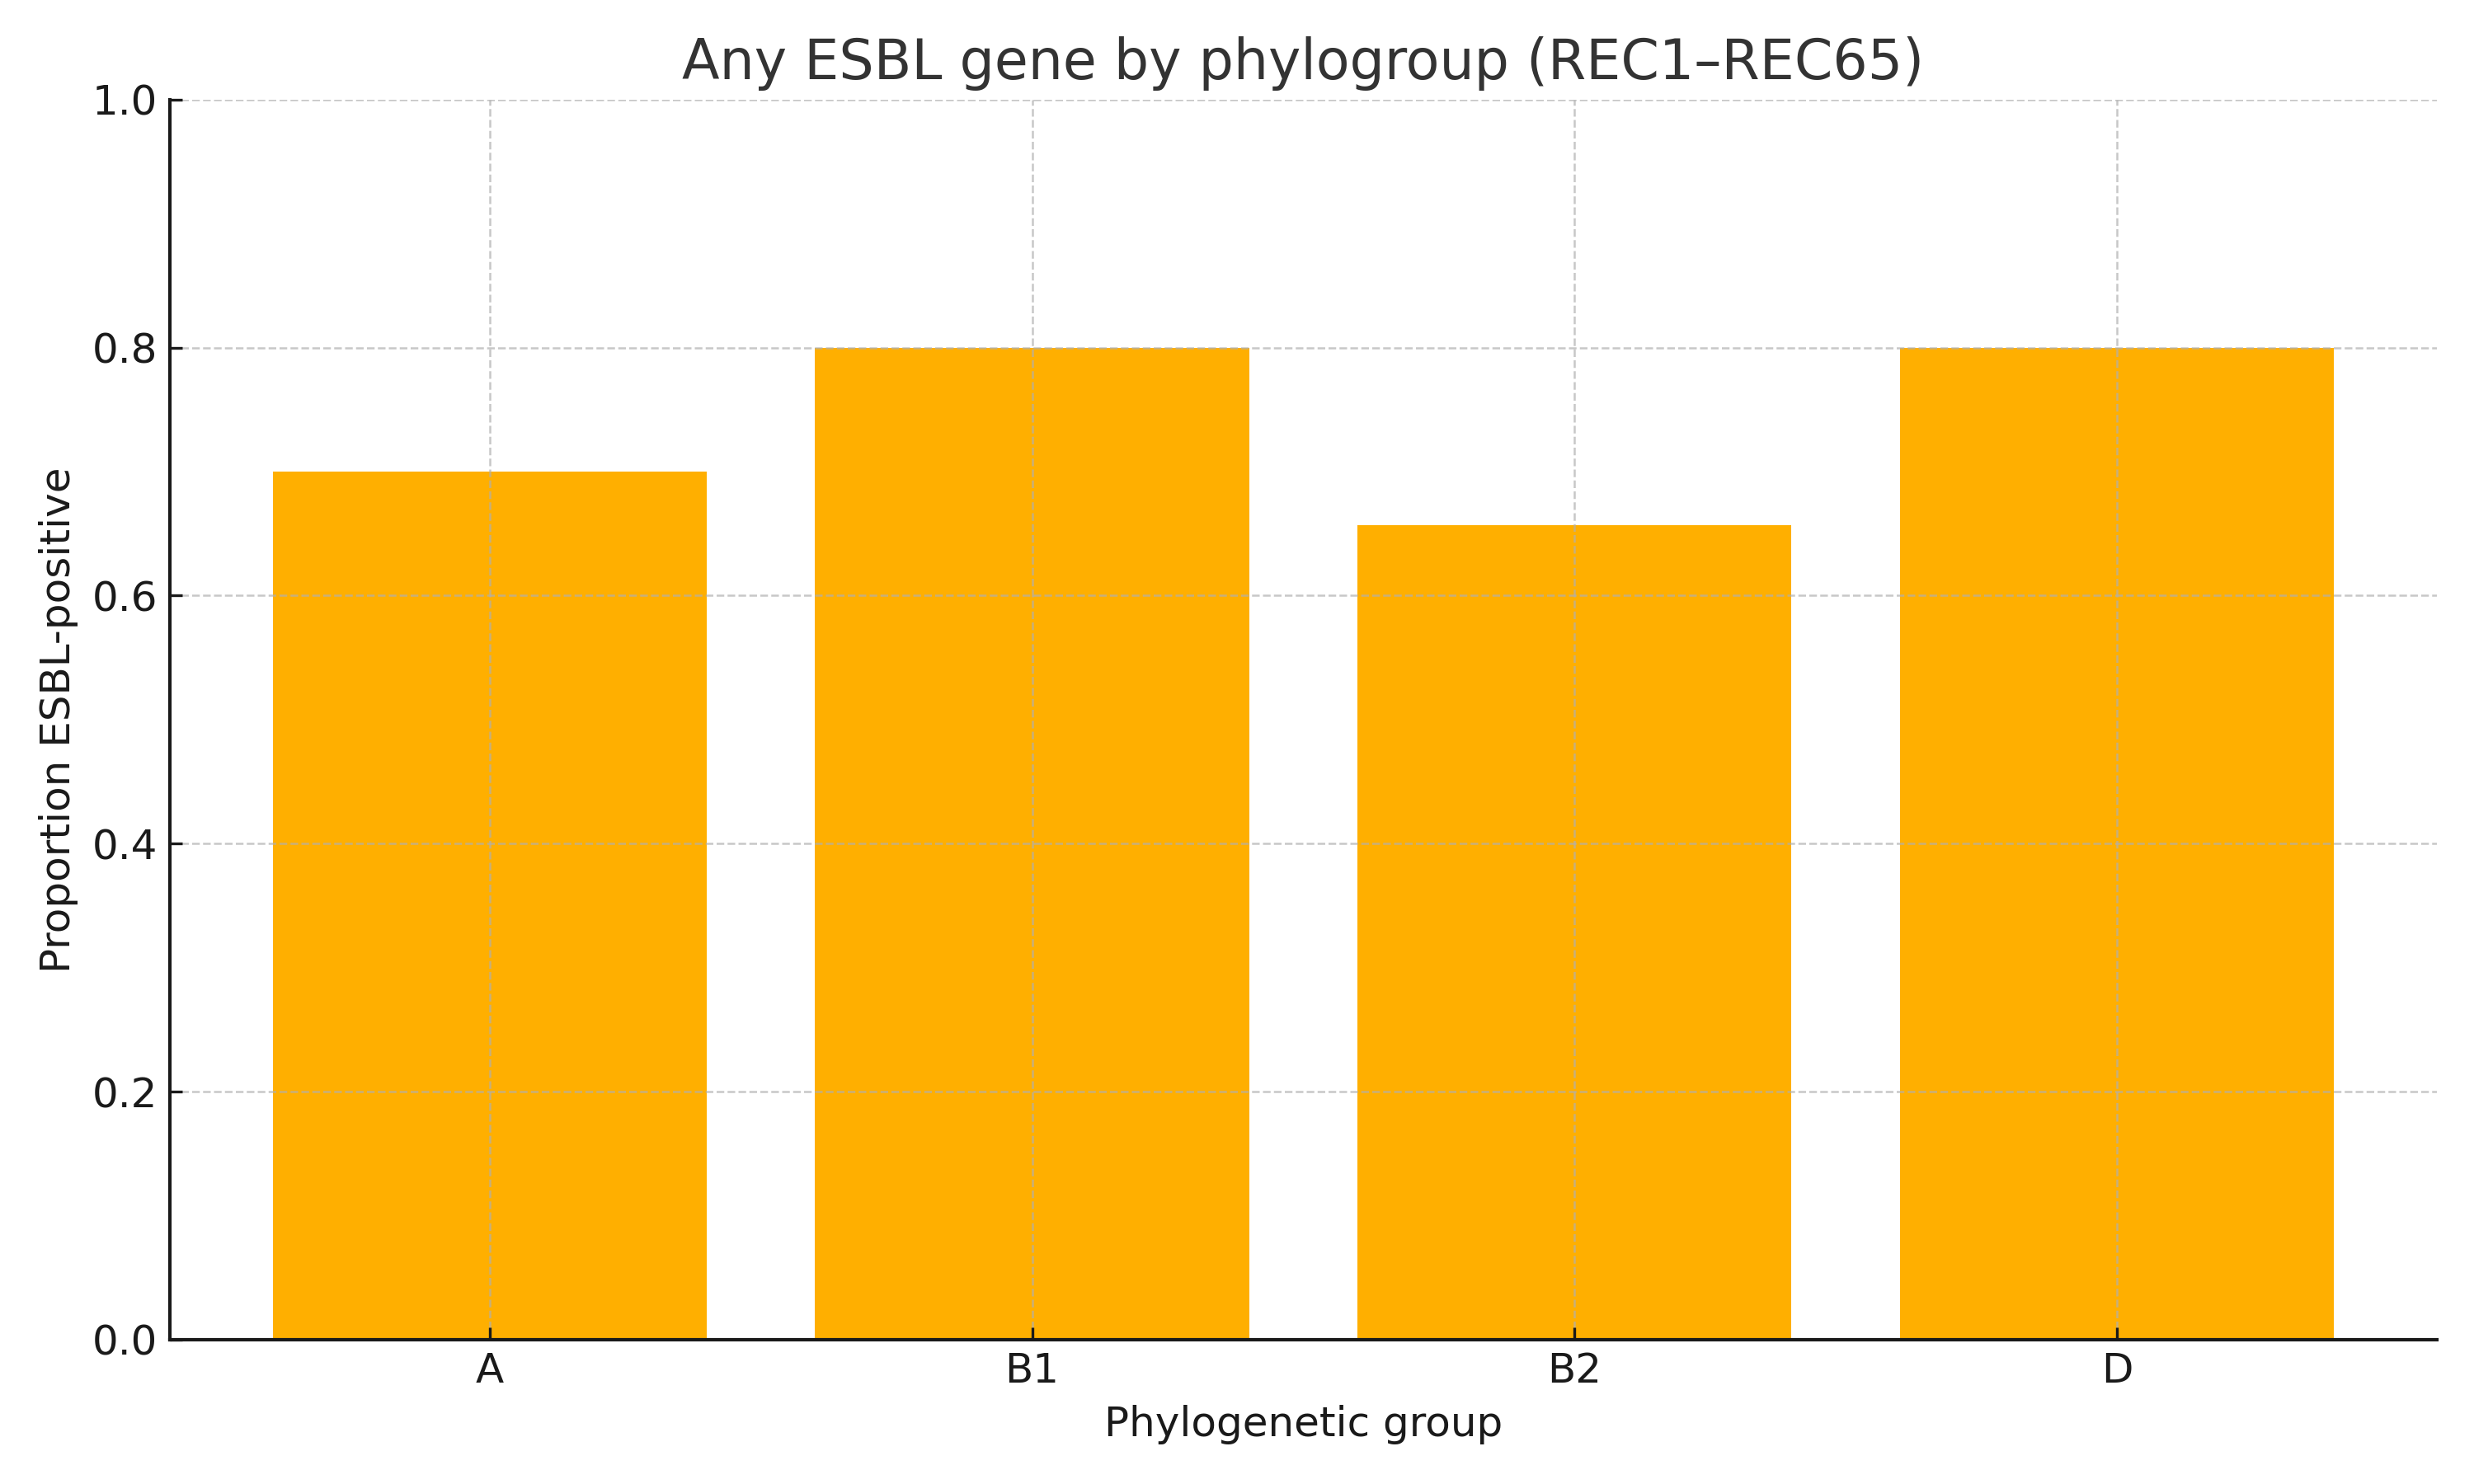
**

**Supplementary Figure S6.** Proportion of integron‑positive isolates by phylogenetic group. The y‑axis indicates proportion (0–1). No significant differences were detected (χ², p > 0.18; see Supplementary Table S5g).


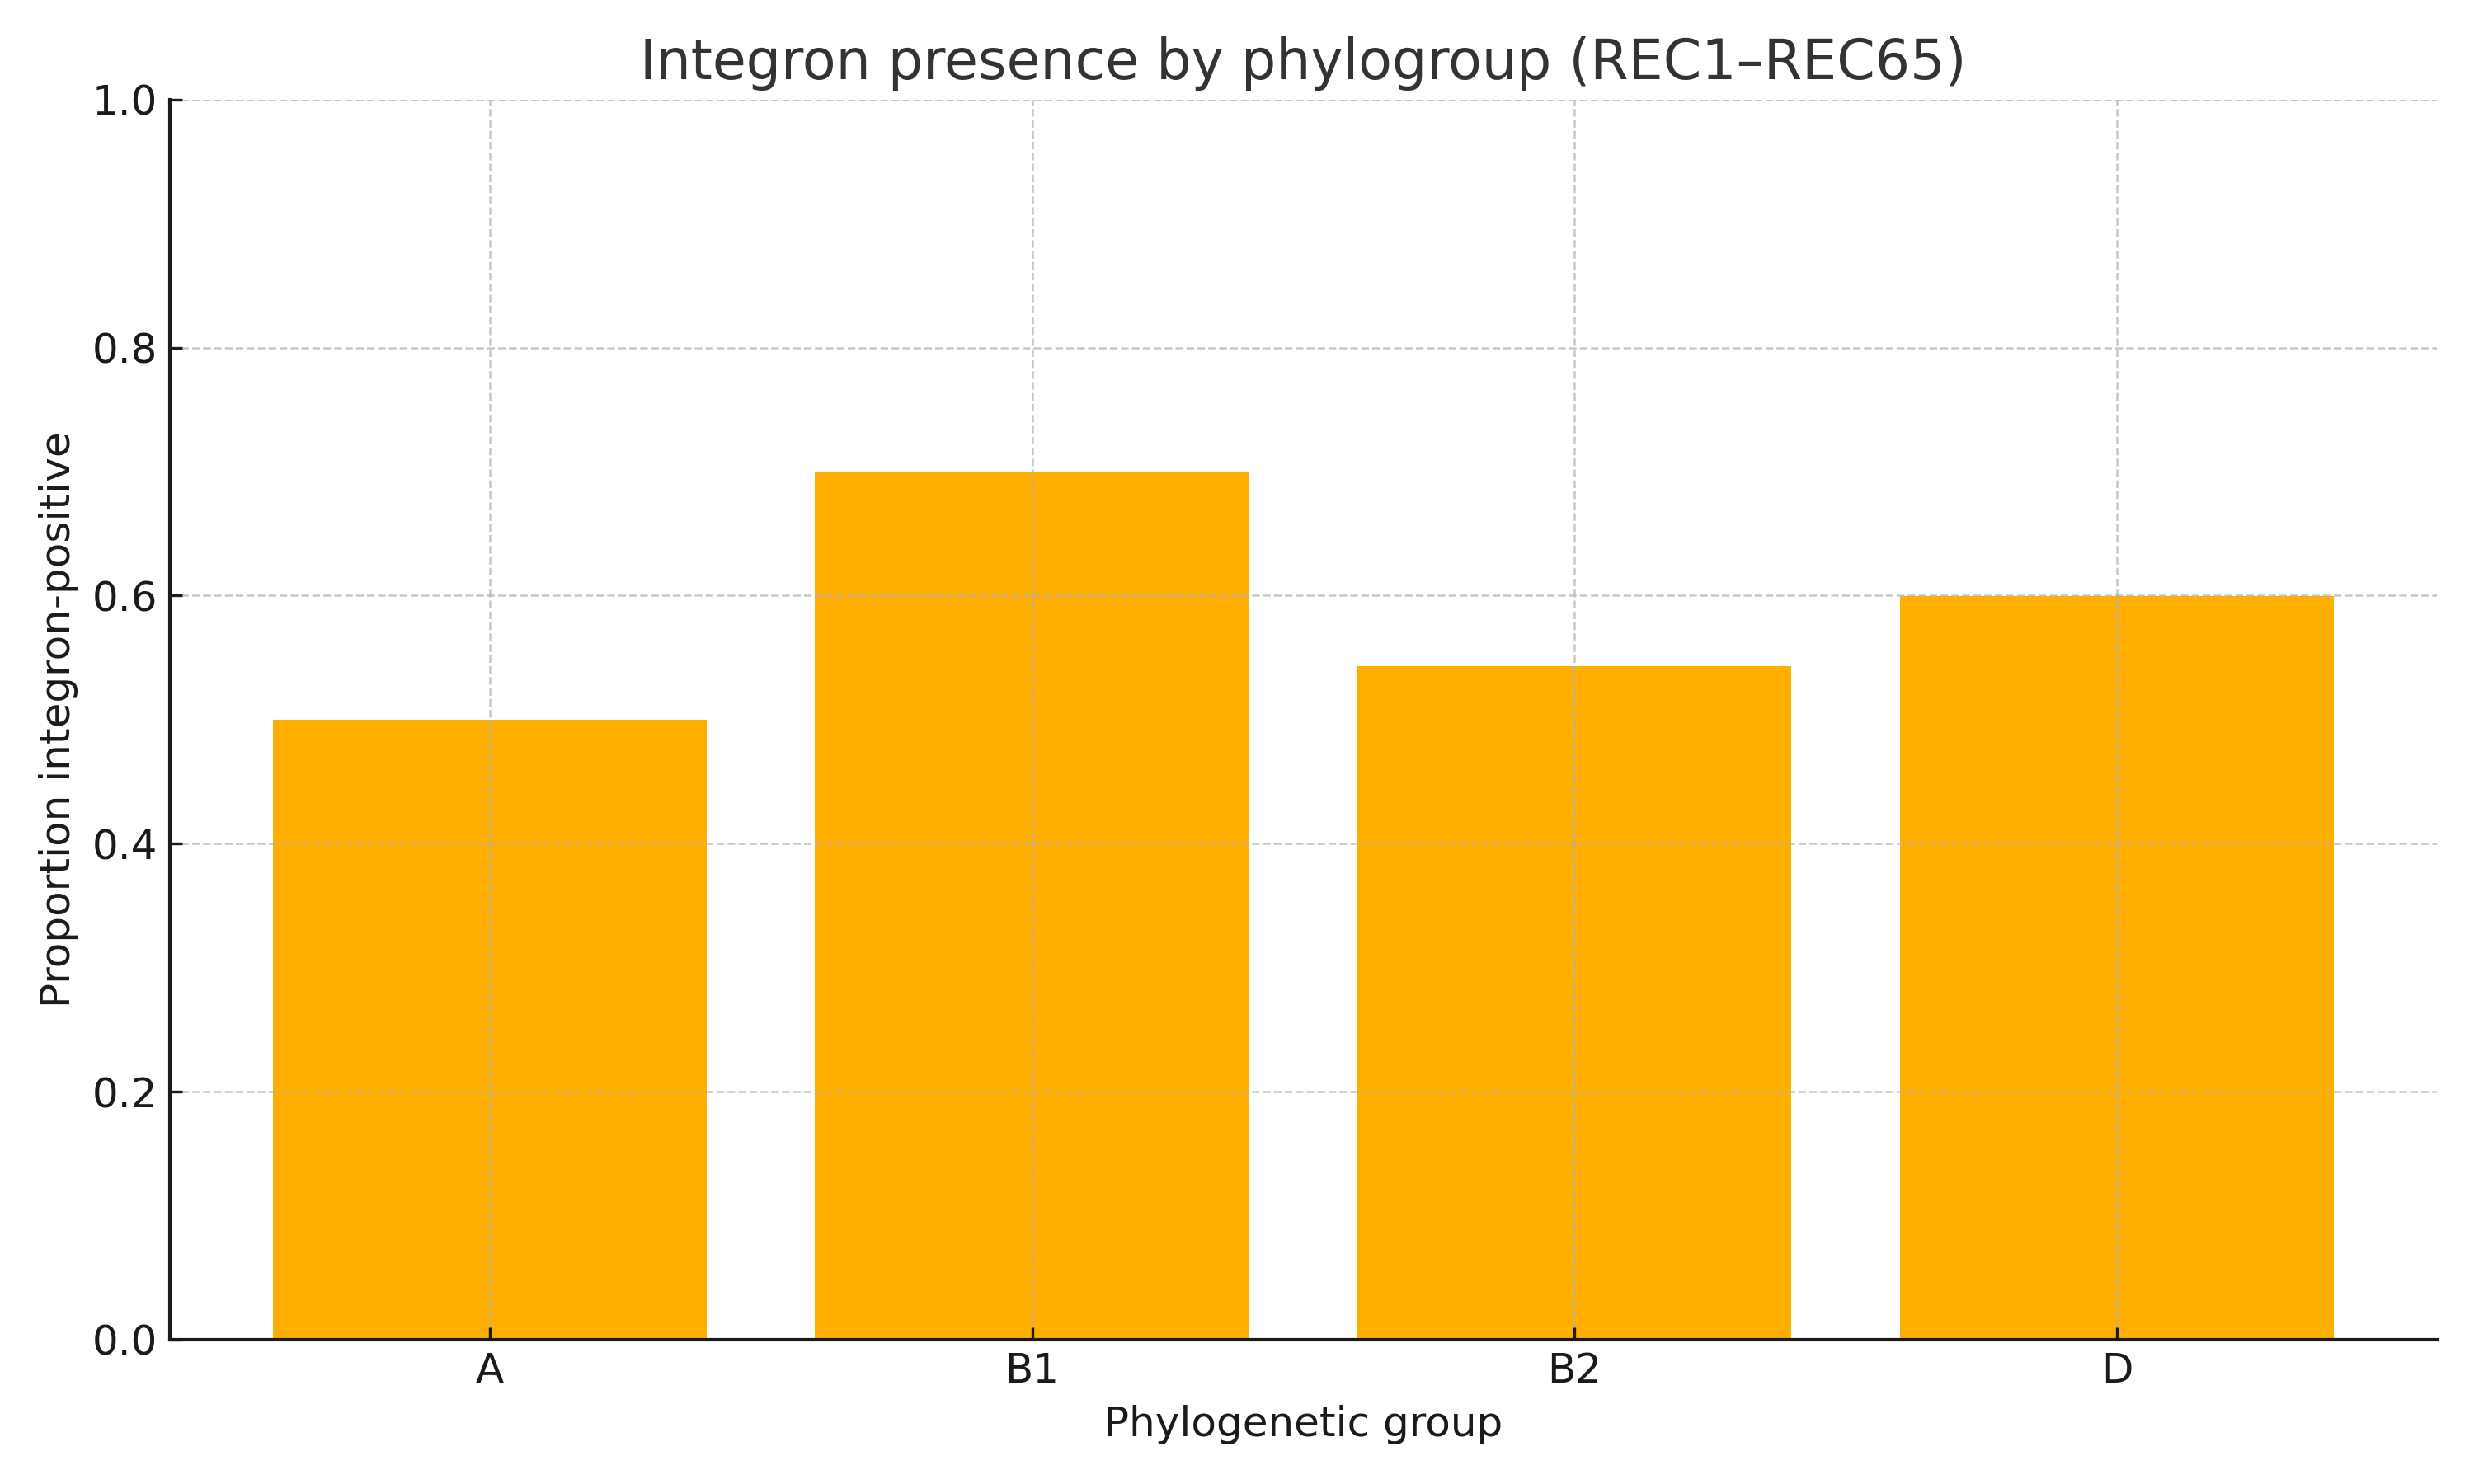

Supplement: Supplementary file 1 [file 770d8fb6b2dd5ec84c7f390b.docx]
